# Supplementary material
Source: publisher site journal article supplement (https://www.dovepress.com/get_supplementary_file.php?f=398223.docx)
Supplement: Supplementary file 1 [file get_supplementary_file.php]

**Supplementary Tables**

**Table S1** – Potential barriers to instigating ASPs in hospitals and improving future antimicrobial prescribing

| - Necessary infrastructure and available personnel within hospitals to undertake ASPs - Adequate knowledge among HCPs in hospitals regarding how to successfully undertake ASPs as well as the role and value of IPC committees - Lack of manpower and resources within hospitals to provide the necessary education among key HCPs to undertake ASPs as well as monitor subsequent prescribing against agreed indicators (Table S2) - with re-education if needed - Overcoming barriers and negative attitudes among HCPs towards undertaking ASPs in their hospitals - Lack of necessary leadership within the hospital to drive ASPs forward - including instigating necessary guidelines based on agreed national/ international guidelines monitoring of agreeing prescribing/ quality indicators before instigating these - Lack of ASP champions currently within the hospital to drive ASPs forward, e.g., key physicians, pharmacists or nurses - Lack of comprehensive documentation regarding antibiotic within the hospital, e.g., indications, doses, and start/ stop dates not well documented to provide the necessary information and stimulus to undertake ASPs. This includes any ongoing research to identify the extent of current guideline adherence – or lack of it - including the rationale, e.g., a lack of faith in current guidelines, lack of ready availability and difficult to use - Lack of up-to-date information regarding AMR patterns within the hospital to improve current empiric prescribing/ be a subject for future ASPs - Adequate facilities and support to undertake diagnostic tests within the hospital, including culture and sensitivity testing, to improve future prescribing - Lack of monitoring of current supplies of antibiotics in hospitals and/ or proactively dealing with possible shortages to minimise any impact of shortages on current ASPs including agreed therapeutic options |
| --- |

**Notes:** Data from these studies.1–10

**Abbreviations**: AMR: Antimicrobial resistance; ASPs: Antimicrobial Stewardship Programmes; HCPs: healthcare professionals; IPC: Infection, Prevention and Control

Table S2 – Summary of Prescribing and Quality indicators being used across Africa

| **Indicator** |
| --- |
| **Activity/Performance Indicators** |
| - % of in-patients prescribed antibiotics in a single PPS or over specific time periods such as successive waves of COVID-19 - % of a course of antibiotics prescribed (duration) in accordance with agreed guidance/ Days of antibiotic therapy per 1000 patient-days % of antibiotics prescribed by defined daily doses (DDDs), e.g., DDDs/1000 patient-days in a PPS or over a specified time - % of a course of antibiotics prescribed (duration) in accordance with agreed guidance/ Days of antibiotic therapy per 1000 patient-days - % IV vs oral antibiotics including % switched as part of de-escalation policies - % of missed doses documented in patients’ notes - % compliance to agreed process measures surrounding AMS including documenting indications for antibiotic use and start/ stop dates in patients’ notes - % of patients prescribed antibiotics within the country’s essential medicine list over an agreed period of time |
| **Process quality indicators** |
| - % of in-patients prescribed antibiotics in adherence to agreed guidelines within a specified time period/ part of a PPS - % of patients prescribed a course of antibiotics in accordance with the agreed guideline duration recommendation within a specified time period/ part of a PPS - % of patients where cultures are taken and sent for analysis to guide antibiotic prescribing/ targeted therapy within a specified time period/ part of a PPS - % of patients prescribed antibiotics post-operatively to prevent SSIs that meet current guideline recommendations - % of antibiotics prescribed based on the AWaRe classification/ % reduction in the prescribing of target antibiotics, e.g., ‘Watch’ cephalosporins to potential ‘Access’ antibiotics (current target is 60% of current prescribing should be ‘Access’ antibiotics) - % of key antibiotics (included in agreed guidelines) available for prescribing, i.e. no/limited shortages - Whether there are agreed therapeutic interchange policies in the hospital when there are likely to be shortages of standard antibiotics for the condition (over a specific time period) (Yes/ No) - % of all admitted patients with pneumonia to the hospital correctly classified and treated according to agreed guidelines (over a specified time period) |
| **Outcome Indicators** |
| - % SSIs following operations (over an agreed time period) – agreed targets - % Mortality rates (post-intervention versus pre-intervention) following changes in antimicrobial prescribing, e.g., reducing extensive antimicrobial prescribing post-surgery for SAP or reducing extensive prescribing of ‘Watch’ antibiotics |

**Notes:** Data from these studies.9–16

**Abbreviations**: AMS: Antimicrobial Stewardship; DDDs: AWaRe classification – WHO AWaRe classification; SAP: Surgical Antibiotic prophylaxis; SSIs: surgical site infections.

**References**

1. Cox JA, Vlieghe E, Mendelson M, Wertheim H, Ndegwa L, Villegas MV, et al. Antibiotic stewardship in low- and middle-income countries: the same but different? Clin Microbiol Infect. 2017;23(11):812-8.

2. Fadare JO, Ogunleye O, Iliyasu G, Adeoti A, Schellack N, Engler D, et al. Status of antimicrobial stewardship programmes in Nigerian tertiary healthcare facilities: Findings and implications. J Glob Antimicrob Resist. 2019;17:132-6.

3. Kalungia AC, Mwambula H, Munkombwe D, Marshall S, Schellack N, May C, et al. Antimicrobial stewardship knowledge and perception among physicians and pharmacists at leading tertiary teaching hospitals in Zambia: implications for future policy and practice. J Chemother. 2019;31(7-8):378-87.

4. Chigome AK, Matlala M, Godman B, Meyer JC. Availability and Use of Therapeutic Interchange Policies in Managing Antimicrobial Shortages among South African Public Sector Hospitals; Findings and Implications. Antibiotics (Basel). 2019;9(1).

5. Mwita JC, Ogunleye OO, Olalekan A, Kalungia AC, Kurdi A, Saleem Z, et al. Key Issues Surrounding Appropriate Antibiotic Use for Prevention of Surgical Site Infections in Low- and Middle-Income Countries: A Narrative Review and the Implications. Int J Gen Med. 2021;14:515-30.

6. Kamere N, Garwe ST, Akinwotu OO, Tuck C, Krockow EM, Yadav S, et al. Scoping Review of National Antimicrobial Stewardship Activities in Eight African Countries and Adaptable Recommendations. Antibiotics. 2022;11(9):1149.

7. Afriyie DK, Sefah IA, Sneddon J, Malcolm W, McKinney R, Cooper L, et al. Antimicrobial point prevalence surveys in two Ghanaian hospitals: opportunities for antimicrobial stewardship. JAC Antimicrob Resist. 2020;2(1):dlaa001.

8. Niaz Q, Godman B, Campbell S, Kibuule D. Compliance to prescribing guidelines among public health care facilities in Namibia; findings and implications. Int J Clin Pharm. 2020;42(4):1227-36.

9. Saleem Z, Godman B, Cook A, Khan MA, Campbell SM, Seaton RA, et al. Ongoing Efforts to Improve Antimicrobial Utilization in Hospitals among African Countries and Implications for the Future. Antibiotics. 2022;11(12):1824.

10. Siachalinga L, Mufwambi W, Lee IH. Impact of antimicrobial stewardship interventions to improve antibiotic prescribing for hospital inpatients in Africa: a systematic review and meta-analysis. J Hosp Infect. 2022;129:124-43.

11. Adekoya I, Maraj D, Steiner L, Yaphe H, Moja L, Magrini N, et al. Comparison of antibiotics included in national essential medicines lists of 138 countries using the WHO Access, Watch, Reserve (AWaRe) classification: a cross-sectional study. Lancet Infect Dis. 2021;21(10):1429-40.

12. Versporten A, Zarb P, Caniaux I, Gros MF, Drapier N, Miller M, et al. Antimicrobial consumption and resistance in adult hospital inpatients in 53 countries: results of an internet-based global point prevalence survey. Lancet Glob Health. 2018;6(6):e619-e29.

13. Nakwatumbah S, Kibuule D, Godman B, Haakuria V, Kalemeera F, Baker A, et al. Compliance to guidelines for the prescribing of antibiotics in acute infections at Namibia's national referral hospital: a pilot study and the implications. Expert Rev Anti Infect Ther. 2017;15(7):713-21.

14. Makwela AB, Grootboom WM, Abraham V, Witika B, Godman B, Skosana PP. Antimicrobial Management of Skin and Soft Tissue Infections among Surgical Wards in South Africa: Findings and Implications. Antibiotics. 2023;12(2):275.

15. Godman B, Egwuenu A, Haque M, Malande OO, Schellack N, Kumar S, et al. Strategies to Improve Antimicrobial Utilization with a Special Focus on Developing Countries. Life. 2021;11(6).

16. Sefah IA, Sarkodie SA, Pichierri G, Schellack N, Godman B. Assessing the Clinical Characteristics and Management of COVID-19 among Pediatric Patients in Ghana: Findings and Implications. Antibiotics. 2023;12(2):283.
